# Supplementary material
Source: MDPI journal article supplement (https://www.mdpi.com/2071-1050/15/11/9135)
Supplement: s1 [file s1]

## Supplementary Materials

# Assessing the Vulnerability of Water Balance to Climate Change at River Basin Scale in Humid Tropics: Implications for a Sustainable Water Future

Kashish Sadhwani<sup>1</sup> and T.I. Eldho<sup>1,2\*</sup>

<sup>1</sup> Department of Civil Engineering, Indian Institute of Technology Bombay, Mumbai-400076, India

<sup>2</sup> Interdisciplinary Program in Climate Studies, Indian Institute of Technology Bombay, Mumbai-400076, India

\* Correspondence: eldho@civil.iitb.ac.in

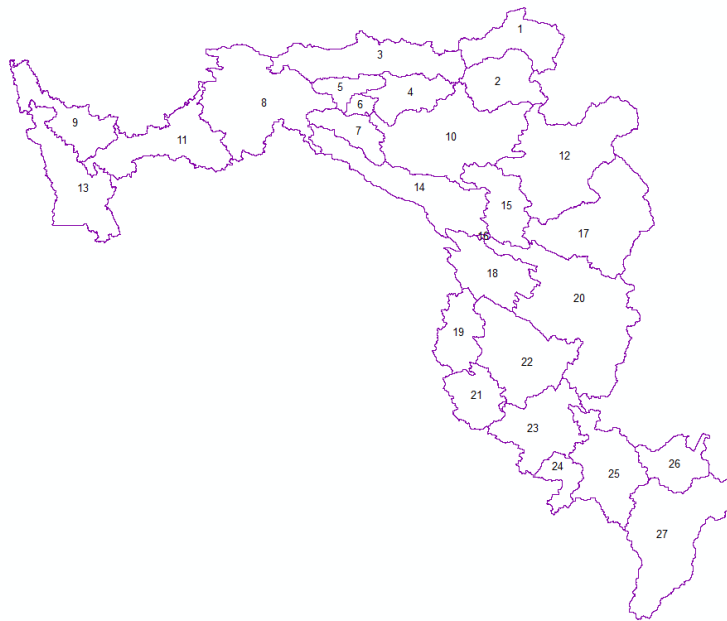

Figure S1: Sub-basin code for Periyar River Basin.

\*To identify the sub-basin locations, refer Figure S1.

**Table S1:** Projected change in annual average precipitation (mm) due to climate change for each sub-basin.

| Subbasin | Historical (base) | SSP 245        |                |               | SSP 585        |                |                |
|----------|-------------------|----------------|----------------|---------------|----------------|----------------|----------------|
|          |                   | Near           | Mid            | Far           | Near           | Mid            | Far            |
| 1        | 158.60            | 196.3(+23.8%)  | 218.4(+37.7%)  | 236.4(+49.1%) | 153.7(-3.1%)   | 182.5(+15.1%)  | 237.7(+49.9%)  |
| 2        | 171.37            | 212.1(+23.8%)  | 236(+37.7%)    | 255.4(+49.1%) | 172.2(+0.5%)   | 197.2(+15.1%)  | 256.9(+49.9%)  |
| 3        | 257.36            | 176.6(-31.4%)  | 217.2(-15.6%)  | 249.2(-3.2%)  | 197.3(-23.3%)  | 195.7(-24%)    | 245.7(-4.5%)   |
| 4        | 258.05            | 177.1(-31.4%)  | 217.7(-15.6%)  | 249.9(-3.2%)  | 197.7(-23.4%)  | 196.2(-24%)    | 246.4(-4.5%)   |
| 5        | 258.05            | 177.1(-31.4%)  | 217.7(-15.6%)  | 249.9(-3.2%)  | 197.7(-23.4%)  | 196.2(-24%)    | 246.4(-4.5%)   |
| 6        | 258.05            | 177.1(-31.4%)  | 217.7(-15.6%)  | 249.9(-3.2%)  | 197.7(-23.4%)  | 196.2(-24%)    | 246.4(-4.5%)   |
| 7        | 258.05            | 177.1(-31.4%)  | 217.7(-15.6%)  | 249.9(-3.2%)  | 197.7(-23.4%)  | 196.2(-24%)    | 246.4(-4.5%)   |
| 8        | 246.43            | 167.1(-32.2%)  | 191.6(-22.3%)  | 209.1(-15.2%) | 191.1(-22.5%)  | 167.1(-32.2%)  | 203.7(-17.3%)  |
| 9        | 128.83            | 112.1(-13%)    | 148.1(+15%)    | 167.4(+30%)   | 83.8(-35%)     | 130.1(+1%)     | 162.7(+26.3%)  |
| 10       | 222.14            | 257.7(+16%)    | 317.7(+43%)    | 355.4(+60%)   | 207.7(-6.5%)   | 280(+26%)      | 352.7(+58.8%)  |
| 11       | 274.84            | 257(-6.5%)     | 278.9(+1.5%)   | 296.5(+7.9%)  | 253.6(-7.7%)   | 244.7(-11%)    | 303.9(+10.6%)  |
| 12       | 215.60            | 250.1(+16%)    | 308.3(+43%)    | 344.9(+60%)   | 198.8(-7.8%)   | 271.7(+26%)    | 342.3(+58.8%)  |
| 13       | 249.07            | 247.3(-0.7%)   | 264.8(+6.3%)   | 272.7(+9.5%)  | 193.5(-22.3%)  | 227.1(-8.8%)   | 285.2(+14.5%)  |
| 14       | 279.21            | 247.3(-11.4%)  | 295.3(+5.8%)   | 328.5(+17.7%) | 207.3(-25.8%)  | 255(-8.7%)     | 325.9(+16.7%)  |
| 15       | 222.14            | 257.7(+16%)    | 317.7(+43%)    | 355.4(+60%)   | 211.1(-5%)     | 280(+26%)      | 352.7(+58.8%)  |
| 16       | 222.14            | 257.7(+16%)    | 317.7(+43%)    | 355.4(+60%)   | 211.1(-5%)     | 280(+26%)      | 352.7(+58.8%)  |
| 17       | 76.99             | 263.7(+242.5%) | 309.1(+301.4%) | 335(+335.2%)  | 211.9(+175.3%) | 279.5(+263%)   | 330.2(+328.9%) |
| 18       | 221.80            | 257.3(+16%)    | 317.2(+43%)    | 354.8(+60%)   | 190.8(-14%)    | 279.5(+26%)    | 352.1(+58.8%)  |
| 19       | 155.33            | 107.7(-30.7%)  | 112.6(-27.5%)  | 119.3(-23.2%) | 88.3(-43.2%)   | 105.6(-32%)    | 120.7(-22.3%)  |
| 20       | 76.96             | 111.8(+45.3%)  | 89.7(+16.5%)   | 85.7(+11.3%)  | 106.3(+38.1%)  | 88.2(+14.6%)   | 92.7(+20.5%)   |
| 21       | 155.54            | 107.8(-30.7%)  | 112.8(-27.5%)  | 119.5(-23.2%) | 88.4(-43.2%)   | 105.8(-32%)    | 120.9(-22.3%)  |
| 22       | 155.98            | 108.1(-30.7%)  | 113.1(-27.5%)  | 119.8(-23.2%) | 88.7(-43.2%)   | 106.1(-32%)    | 121.2(-22.3%)  |
| 23       | 216.38            | 306(+41.4%)    | 360.6(+66.7%)  | 389.8(+80.2%) | 228.1(+5.4%)   | 320.1(+47.9%)  | 389.6(+80.1%)  |
| 24       | 215.56            | 304.9(+41.4%)  | 359.3(+66.7%)  | 388.3(+80.2%) | 227.3(+5.4%)   | 318.9(+47.9%)  | 388.2(+80.1%)  |
| 25       | 79.41             | 275.6(+247%)   | 348.9(+339.4%) | 387.6(+388%)  | 188.8(+137.7%) | 299.3(+276.9%) | 378(+376%)     |
| 26       | 78.48             | 272.4(+247%)   | 344.8(+339.4%) | 383(+388%)    | 193.2(+146.2%) | 295.8(+276.9%) | 373.6(+376%)   |
| 27       | 69.00             | 239.5(+247%)   | 303.1(+339.4%) | 336.7(+388%)  | 197.3(+186%)   | 260(+276.9%)   | 328.4(+376%)   |

**Table S2:** Projected change in annual average ET (mm) due to climate change for each sub-basin.

| Subbasin |                   | SSP 245      |              |              |              |              |              |
|----------|-------------------|--------------|--------------|--------------|--------------|--------------|--------------|
|          | Historical (base) | Near         | Mid          | Far          | Near         | Mid          | Far          |
| 1        | 70.54             | 53(-24.9%)   | 54.1(-23.3%) | 54.9(-22.2%) | 51.2(-27.5%) | 52.3(-25.9%) | 56.4(-20.1%) |
| 2        | 76.60             | 57.9(-24.4%) | 59.2(-22.8%) | 60(-21.7%)   | 56(-26.9%)   | 57.2(-25.3%) | 61.6(-19.6%) |
| 3        | 90.02             | 58.9(-34.6%) | 59.5(-33.9%) | 60.8(-32.5%) | 57.7(-35.9%) | 58.8(-34.7%) | 62.3(-30.8%) |
| 4        | 74.75             | 52.3(-30%)   | 52.6(-29.7%) | 54(-27.8%)   | 51.1(-31.7%) | 51.2(-31.5%) | 55.4(-25.9%) |
| 5        | 76.67             | 52.9(-31%)   | 53.2(-30.6%) | 54.7(-28.7%) | 51.8(-32.4%) | 52.1(-32.1%) | 56.3(-26.5%) |
| 6        | 76.53             | 52.9(-30.9%) | 53.2(-30.5%) | 54.6(-28.6%) | 52.1(-31.9%) | 52(-32.1%)   | 56.2(-26.5%) |
| 7        | 73.91             | 50.7(-31.4%) | 50.9(-31.1%) | 52.5(-29%)   | 50.3(-32%)   | 49.8(-32.6%) | 54.2(-26.7%) |
| 8        | 74.46             | 50.8(-31.7%) | 51.1(-31.3%) | 52.6(-29.4%) | 50.4(-32.4%) | 50.1(-32.7%) | 54.6(-26.7%) |
| 9        | 36.84             | 26(-29.5%)   | 26.4(-28.4%) | 27.2(-26%)   | 24.9(-32.5%) | 25.8(-30.1%) | 28.3(-23.3%) |
| 10       | 79.05             | 55.1(-30.3%) | 56.2(-28.9%) | 58(-26.6%)   | 54.2(-31.5%) | 56.3(-28.8%) | 60.1(-24%)   |
| 11       | 79.48             | 55.4(-30.3%) | 56.2(-29.3%) | 58(-27%)     | 53.2(-33%)   | 54.6(-31.3%) | 59.5(-25.1%) |
| 12       | 73.52             | 52.2(-29.1%) | 53(-27.9%)   | 54.8(-25.4%) | 51.1(-30.5%) | 53(-27.9%)   | 56.9(-22.6%) |
| 13       | 101.18            | 66.6(-34.2%) | 67.1(-33.7%) | 67.5(-33.3%) | 65.4(-35.4%) | 66.1(-34.7%) | 69.1(-31.7%) |
| 14       | 81.38             | 54.8(-32.6%) | 54.9(-32.5%) | 56(-31.2%)   | 53.1(-34.8%) | 54.6(-32.9%) | 58.8(-27.8%) |
| 15       | 77.03             | 54.3(-29.5%) | 55.4(-28.1%) | 57.2(-25.8%) | 53.3(-30.8%) | 55.4(-28.1%) | 59.3(-23%)   |
| 16       | 80.56             | 55(-31.7%)   | 56(-30.5%)   | 58(-28%)     | 54.2(-32.7%) | 56.3(-30.1%) | 60.3(-25.1%) |
| 17       | 45.46             | 51.8(+13.9%) | 52.2(+14.8%) | 53.4(+17.5%) | 50.3(+10.5%) | 50.9(+12%)   | 55.3(+21.7%) |
| 18       | 75.07             | 53(-29.4%)   | 53.9(-28.3%) | 55.8(-25.7%) | 52.2(-30.4%) | 53.9(-28.2%) | 58(-22.7%)   |
| 19       | 90.00             | 58.9(-34.6%) | 58.7(-34.8%) | 58.5(-35%)   | 57.8(-35.7%) | 57.4(-36.2%) | 60(-33.3%)   |
| 20       | 47.30             | 44.8(-5.4%)  | 43.9(-7.2%)  | 45.2(-4.4%)  | 43.2(-8.6%)  | 42.8(-9.5%)  | 46.8(-1.1%)  |
| 21       | 69.13             | 47.1(-31.9%) | 46.9(-32.2%) | 47.3(-31.6%) | 45.3(-34.4%) | 45(-34.9%)   | 48.7(-29.5%) |
| 22       | 80.24             | 53.8(-33%)   | 53.6(-33.2%) | 53.7(-33.1%) | 52(-35.3%)   | 51.9(-35.3%) | 55.2(-31.3%) |
| 23       | 77.72             | 54.2(-30.3%) | 55.1(-29.1%) | 56.5(-27.3%) | 52.1(-32.9%) | 53.5(-31.2%) | 58.6(-24.6%) |
| 24       | 76.00             | 52.6(-30.8%) | 53.5(-29.6%) | 55(-27.6%)   | 50.6(-33.5%) | 51.9(-31.8%) | 57.1(-24.9%) |
| 25       | 57.89             | 53.8(-7.1%)  | 55.9(-3.4%)  | 58.1(+0.4%)  | 53.4(-7.8%)  | 54.9(-5.2%)  | 59.9(+3.4%)  |
| 26       | 53.46             | 52.6(-1.6%)  | 55(+2.9%)    | 57.3(+7.1%)  | 51.7(-3.2%)  | 53.6(+0.3%)  | 59(+10.4%)   |
| 27       | 44.57             | 45.7(+2.6%)  | 47.8(+7.2%)  | 49.8(+11.7%) | 44.8(+0.6%)  | 46.6(+4.5%)  | 51.3(+15%)   |

**Table S3:** Projected change in annual average runoff (mm) due to climate change for each sub-basin.

| Subbasin |                   | SSP 245       |                |                |               |               |                |
|----------|-------------------|---------------|----------------|----------------|---------------|---------------|----------------|
|          | Historical (base) | Near          | Mid            | Far            | Near          | Mid           | Far            |
| 1        | 29.81             | 53.9(+80.7%)  | 60.4(+102.5%)  | 64.1(+115.1%)  | 33.1(+10.9%)  | 46(+54.3%)    | 66.8(+124.1%)  |
| 2        | 28.38             | 51.5(+81.5%)  | 57.6(+103%)    | 61.1(+115.4%)  | 31.4(+10.6%)  | 43.8(+54.3%)  | 63.8(+124.7%)  |
| 3        | 78.18             | 40.9(-47.7%)  | 62(-20.7%)     | 78.1(-0.1%)    | 40.5(-48.2%)  | 54.9(-29.8%)  | 74.1(-5.3%)    |
| 4        | 61.17             | 30.8(-49.6%)  | 48.1(-21.3%)   | 61.5(+0.6%)    | 26.3(-56.9%)  | 42.5(-30.5%)  | 57.7(-5.6%)    |
| 5        | 84.31             | 44.3(-47.5%)  | 66.9(-20.7%)   | 84(-0.4%)      | 44.9(-46.7%)  | 59.2(-29.8%)  | 79.9(-5.2%)    |
| 6        | 75.51             | 39.4(-47.9%)  | 59.8(-20.8%)   | 75.3(-0.3%)    | 42(-44.4%)    | 53.1(-29.6%)  | 71.2(-5.6%)    |
| 7        | 82.49             | 43.3(-47.5%)  | 65.7(-20.3%)   | 82.7(+0.2%)    | 41.2(-50.1%)  | 57.9(-29.8%)  | 78.7(-4.6%)    |
| 8        | 73.79             | 39.4(-46.6%)  | 52.4(-29%)     | 59(-20%)       | 45.7(-38.1%)  | 43.5(-41.1%)  | 52.9(-28.4%)   |
| 9        | 70.20             | 66.8(-4.8%)   | 99.9(+42.3%)   | 114.1(+62.5%)  | 61.5(-12.3%)  | 84.6(+20.5%)  | 108.5(+54.5%)  |
| 10       | 43.97             | 68.9(+56.6%)  | 102.4(+132.9%) | 117.9(+168.1%) | 33.6(-23.7%)  | 83.6(+90.1%)  | 112.5(+155.9%) |
| 11       | 78.14             | 84(+7.4%)     | 91.3(+16.8%)   | 94.6(+21%)     | 61.9(-20.8%)  | 76.7(-1.9%)   | 100.5(+28.6%)  |
| 12       | 34.71             | 58.8(+69.4%)  | 88.7(+155.5%)  | 102.2(+194.3%) | 26.6(-23.3%)  | 71.4(+105.8%) | 97.2(+180%)    |
| 13       | 84.00             | 98.6(+17.3%)  | 105.8(+25.9%)  | 104.8(+24.8%)  | 70.2(-16.4%)  | 86.2(+2.6%)   | 113.6(+35.3%)  |
| 14       | 95.22             | 79.3(-16.7%)  | 112.2(+17.9%)  | 130.3(+36.8%)  | 40.2(-57.8%)  | 87.8(-7.8%)   | 127.1(+33.4%)  |
| 15       | 39.31             | 63.7(+62%)    | 95.3(+142.3%)  | 109.7(+179.1%) | 30(-23.7%)    | 77.2(+96.5%)  | 104.6(+166%)   |
| 16       | 66.69             | 98.5(+47.6%)  | 143.4(+115%)   | 166.4(+149.5%) | 75.6(+13.4%)  | 118.4(+77.5%) | 160.4(+140.5%) |
| 17       | 2.53              | 61.6(+2331%)  | 75(+2860.1%)   | 81.2(+3104%)   | 42.9(+1593%)  | 66(+2503.6%)  | 78.2(+2983%)   |
| 18       | 37.11             | 61.5(+65.7%)  | 92.3(+148.7%)  | 106.2(+186%)   | 38.6(+3.9%)   | 74.7(+101%)   | 101.1(+172%)   |
| 19       | 18.80             | 11(-41.3%)    | 11.9(-36.8%)   | 13.3(-29.2%)   | 6.5(-65.2%)   | 10.9(-42%)    | 13.4(-28.6%)   |
| 20       | 2.67              | 11.6(+332.8%) | 6.7(+151%)     | 6(+125.6%)     | 10.9(+309%)   | 6.8(+155.8%)  | 6.5(+142.9%)   |
| 21       | 15.07             | 8.4(-44.1%)   | 9.1(-39.6%)    | 10.4(-31.2%)   | 4.6(-69.3%)   | 8.2(-45.5%)   | 10.5(-30.4%)   |
| 22       | 14.85             | 8.1(-45.3%)   | 8.8(-40.8%)    | 10(-32.5%)     | 4.4(-70.5%)   | 7.9(-46.7%)   | 10.2(-31.3%)   |
| 23       | 32.58             | 78.8(+141.7%) | 102.2(+213%)   | 107.4(+229%)   | 46.8(+43.7%)  | 87.6(+169%)   | 106.7(+227%)   |
| 24       | 34.24             | 81.1(+136.9%) | 104.9(+206%)   | 110.2(+221%)   | 48.8(+42.6%)  | 90.2(+163%)   | 109.4(+219%)   |
| 25       | 3.38              | 64.3(+1800%)  | 91(+2590%)     | 98.7(+2818%)   | 30(+787.1%)   | 72.5(+2043%)  | 94.2(+2686%)   |
| 26       | 6.27              | 84.6(+1249%)  | 118.5(+1789%)  | 129.4(+1963%)  | 41.9(+567.9%) | 95.7(+1426%)  | 124(+1877.3%)  |
| 27       | 4.67              | 75.1(+1508%)  | 105.8(+2167%)  | 115.5(+2374%)  | 36.1(+673.9%) | 84.9(+1718%)  | 110.5(+2267%)  |

**Table S4:** Projected change in annual average groundwater discharge (mm) due to climate change for each sub-basin.

| Subbasin |                   | SSP 245       |                |                |              |                |                |
|----------|-------------------|---------------|----------------|----------------|--------------|----------------|----------------|
|          | Historical (base) | Near          | Mid            | Far            | Near         | Mid            | Far            |
| 1        | 27.24             | 56.9(+108.7%) | 67.3(+147%)    | 77.1(+182.9%)  | 36(+32%)     | 51.5(+89%)     | 73.9(+171.4%)  |
| 2        | 27.96             | 58(+107.4%)   | 68.7(+145.6%)  | 78.6(+181.2%)  | 36.5(+30.6%) | 52.5(+87.8%)   | 75.5(+170%)    |
| 3        | 54.23             | 47(-13.4%)    | 59.3(+9.3%)    | 68.6(+26.6%)   | 40.8(-24.8%) | 49.6(-8.5%)    | 67.5(+24.4%)   |
| 4        | 40.09             | 33.2(-17.1%)  | 43.5(+8.6%)    | 51.4(+28.1%)   | 37.7(-5.9%)  | 35.9(-10.6%)   | 50.3(+25.5%)   |
| 5        | 55.91             | 49.5(-11.5%)  | 61.5(+10%)     | 70.7(+26.5%)   | 39.2(-29.9%) | 51.7(-7.6%)    | 69.5(+24.2%)   |
| 6        | 60.69             | 51.5(-15.1%)  | 64.9(+7%)      | 75.2(+23.9%)   | 39.1(-35.6%) | 54.6(-10.1%)   | 74(+21.9%)     |
| 7        | 40.94             | 38.3(-6.5%)   | 47.2(+15.2%)   | 54(+31.8%)     | 26.4(-35.5%) | 39.3(-4%)      | 52.8(+28.9%)   |
| 8        | 64.69             | 53.7(-17%)    | 61.6(-4.8%)    | 68.8(+6.3%)    | 40.5(-37.4%) | 49.8(-23%)     | 67.4(+4.2%)    |
| 9        | 85.82             | 83.8(-2.4%)   | 116(+35.2%)    | 135.1(+57.5%)  | 75.5(-12%)   | 98.4(+14.7%)   | 129.3(+50.7%)  |
| 10       | 36.41             | 63.4(+74.2%)  | 76.4(+110%)    | 87.2(+139.6%)  | 53.4(+46.7%) | 65.3(+79.4%)   | 87.3(+139.9%)  |
| 11       | 86.48             | 91.5(+5.8%)   | 103.3(+19.5%)  | 113.3(+31.1%)  | 69.6(-19.5%) | 87.1(+0.8%)    | 112.4(+30%)    |
| 12       | 16.88             | 36(+113.2%)   | 44.7(+165%)    | 51.7(+206.4%)  | 38(+125.4%)  | 37.3(+121%)    | 51.6(+205.7%)  |
| 13       | 73.21             | 80.6(+10.1%)  | 89.5(+22.3%)   | 96.5(+31.8%)   | 59.1(-19.2%) | 74.1(+1.2%)    | 98(+33.8%)     |
| 14       | 52.76             | 66.6(+26.2%)  | 75.1(+42.3%)   | 83.8(+58.8%)   | 56.1(+6.4%)  | 64.7(+22.6%)   | 81.3(+54.2%)   |
| 15       | 26.59             | 49.6(+86.5%)  | 60.3(+126.9%)  | 69.2(+160.1%)  | 42.3(+59.2%) | 51.1(+92.1%)   | 69.1(+160%)    |
| 16       | 41.21             | 69.5(+68.6%)  | 78.7(+90.9%)   | 87.4(+112.1%)  | 57.4(+39.2%) | 68.8(+66.9%)   | 87.9(+113.4%)  |
| 17       | 1.18              | 37.1(+3038%)  | 47.3(+3893.6%) | 53.5(+4417.6%) | 30(+2438.8%) | 40.1(+3284%)   | 51.4(+4239%)   |
| 18       | 20.46             | 40.8(+99.6%)  | 50(+144.3%)    | 57.3(+180.3%)  | 28.9(+41.4%) | 42(+105.6%)    | 57.2(+179.8%)  |
| 19       | 12.83             | 10.8(-15.7%)  | 12.4(-3.1%)    | 14.1(+10.1%)   | 6.5(-49.5%)  | 10.6(-17.2%)   | 13.9(+8.3%)    |
| 20       | 0.96              | 9.2(+866.6%)  | 4.8(+403.5%)   | 3.7(+290.9%)   | 8.6(+802.9%) | 4.6(+385%)     | 4.8(+398.5%)   |
| 21       | 7.70              | 6.1(-21%)     | 7(-9.7%)       | 7.9(+2.9%)     | 3.9(-49.7%)  | 6(-22.1%)      | 7.9(+2.4%)     |
| 22       | 9.27              | 7.5(-19.2%)   | 8.6(-7.4%)     | 9.8(+5.2%)     | 4.6(-50.6%)  | 7.4(-20.2%)    | 9.6(+3.9%)     |
| 23       | 20.87             | 54.8(+162.7%) | 65.8(+215.3%)  | 74.6(+257.7%)  | 37.6(+80.1%) | 55.5(+166%)    | 73.2(+250.9%)  |
| 24       | 18.64             | 50.9(+172.9%) | 61.1(+227.9%)  | 69.3(+272%)    | 34.7(+86%)   | 51.5(+176.1%)  | 68(+264.8%)    |
| 25       | 1.11              | 50.9(+4462%)  | 67.9(+5987%)   | 79(+6983.3%)   | 30.5(+2631%) | 55.4(+4866%)   | 75.6(+6682.6%) |
| 26       | 1.34              | 80.1(+5874%)  | 104.1(+7662%)  | 120.5(+8889%)  | 51.7(+3757%) | 86.5(+6349.2%) | 116.1(+8556%)  |
| 27       | 1.09              | 64.4(+5801%)  | 84.7(+7653%)   | 98.3(+8905%)   | 40.4(+3599%) | 69.8(+6292.6%) | 94.5(+8551.6%) |
